# Supplementary material for: Hydrogen and nitrogen codoping of anatase TiO2 for efficiency enhancement in organic solar cells
Source: PubMed Central journal article supplement (PMC5736610; doi:10.1038/s41598-017-18051-0), 2017-12-19
Supplement: 41598_2017_18051_MOESM1_ESM.pdf [file 41598_2017_18051_MOESM1_ESM.pdf]

## Supporting Information

### Hydrogen and nitrogen codoping of anatase TiO<sub>2</sub> for efficiency enhancement in organic solar cells

Maria Vasilopoulou,<sup>1,\*</sup> Nikolaos Kelaidis,<sup>2</sup> Ermioni Polydorou,<sup>1,3</sup>  
Anastasia Soultati,<sup>1</sup> Dimitris Davazoglou,<sup>1</sup> Panagiotis Argitis,<sup>1</sup> Giorgos  
Papadimitropoulos,<sup>1</sup> Dimitris Tsikritzis,<sup>4</sup> Stella Kennou,<sup>4</sup> Florian Auras,<sup>5</sup>  
Dimitra G. Georgiadou,<sup>1,6</sup> Stavros-Richard Christopoulos<sup>2</sup> & Alexander  
Chroneos,<sup>2,7,\*</sup>

<sup>1</sup>*Institute of Nanoscience and Nanotechnology (INN), National Center for Scientific  
Research Demokritos, 15310 Agia Paraskevi, Athens, Greece*

<sup>2</sup>*Faculty of Engineering, Environment and Computing, Coventry University, Priory  
Street, Coventry CV1 5FB, United Kingdom*

<sup>3</sup>*Department of Physics, University of Patras, 26504, Patras, Greece*

<sup>4</sup>*Department of Chemical Engineering, University of Patras, 26504, Patras, Greece*

<sup>5</sup>*Cavendish Laboratory, University of Cambridge, Cambridge CB3 0HE, United  
Kingdom*

<sup>6</sup>*Department of Physics & Centre for Plastic Electronics, Imperial College, London  
SW7 2AZ, United Kingdom*

<sup>7</sup>*Department of Materials, Imperial College, London SW7 2AZ, United Kingdom*

\*[m.vasilopoulou@inn.demokritos.gr](mailto:m.vasilopoulou@inn.demokritos.gr), [alexander.chroneos@imperial.ac.uk](mailto:alexander.chroneos@imperial.ac.uk)

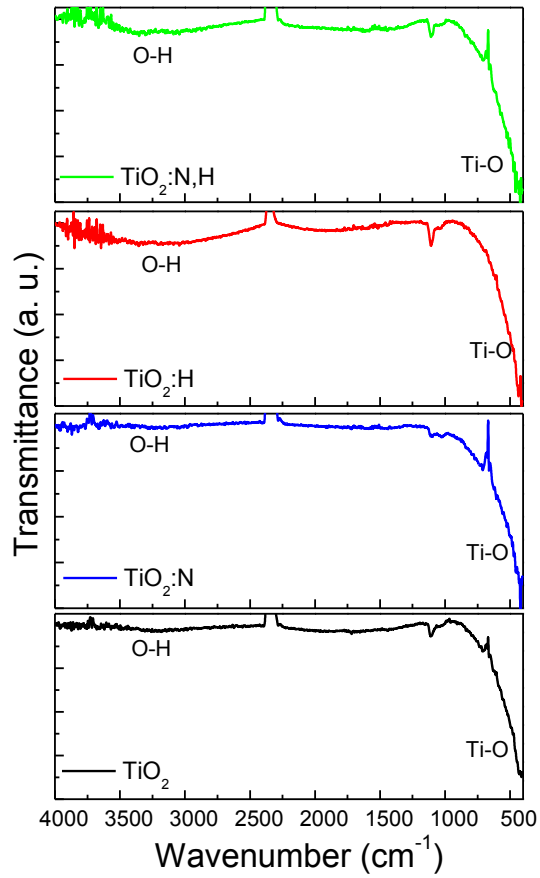

**Figure S1.** FTIR transmittance spectra of TiO<sub>2</sub> samples either as-deposited (on silicon substrates) or annealed in nitrogen, hydrogen and forming gas (containing 90% nitrogen and 10% hydrogen) at 550 °C for 1 h. The thickness of the samples was ~40 nm.

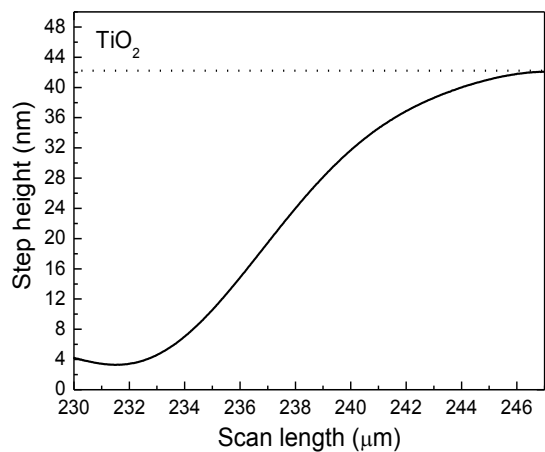

(a)

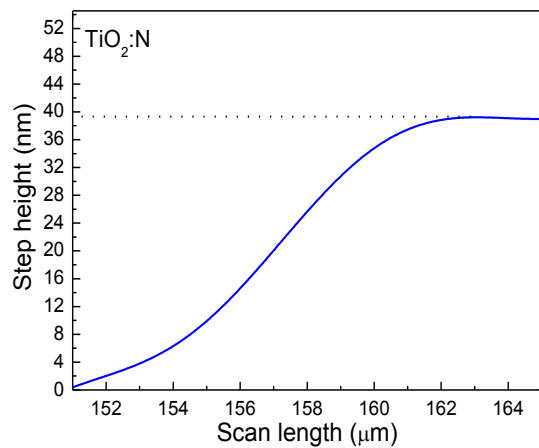

(b)

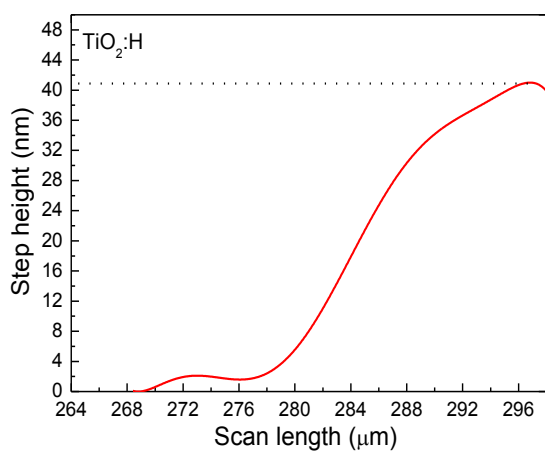

(c)

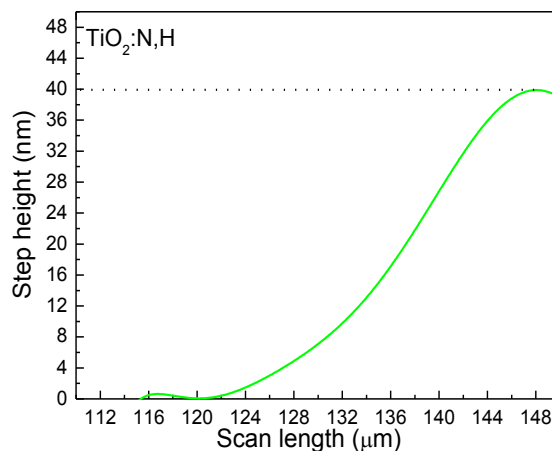

(d)

**Figure S2.** Profilometer thickness profile measurements of  $\text{TiO}_2$  samples.

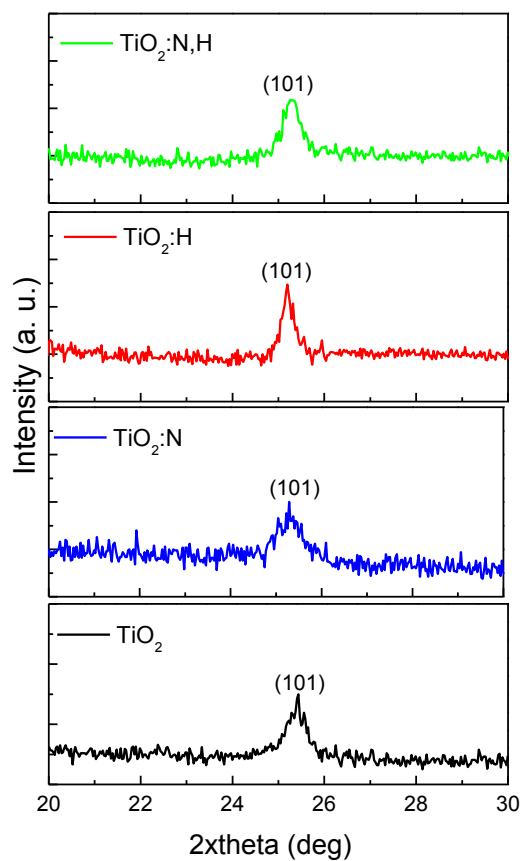

**Figure S3.** X-ray diffraction patterns of TiO<sub>2</sub> samples with a thickness of ~40 nm. The samples were either as-deposited or annealed in nitrogen, hydrogen and forming gas at 550 °C for 1 h.

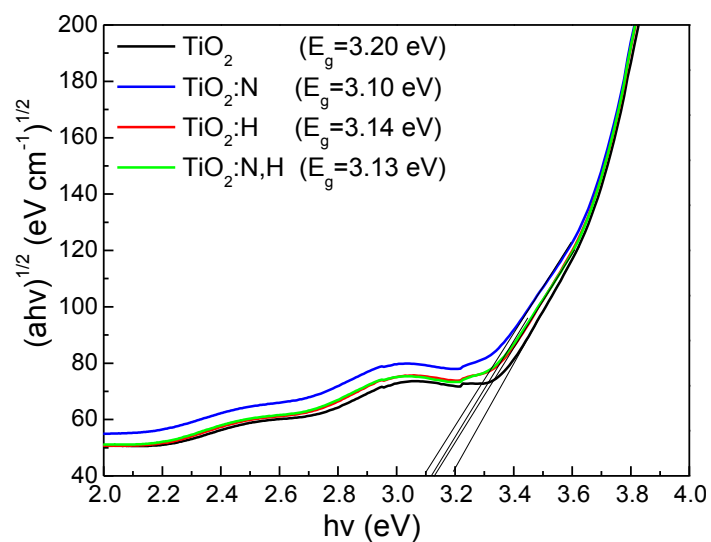

**Figure S4.** Tauc plots, as derived from absorption measurements, for the estimation of bandgap for the different TiO<sub>2</sub> samples.

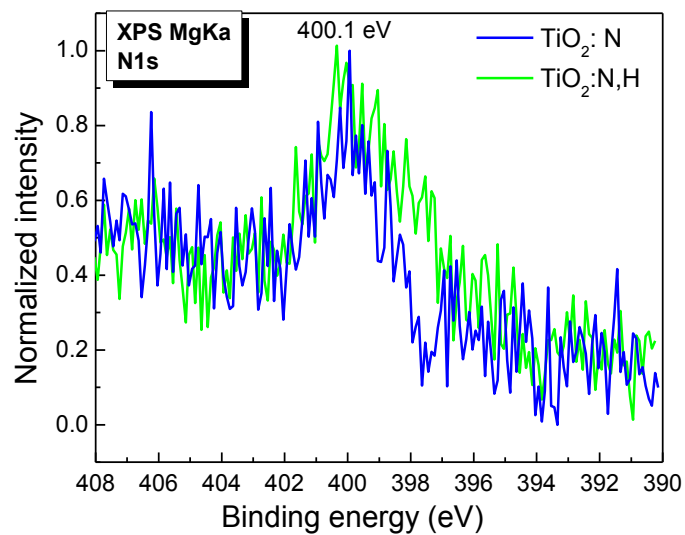

**Figure S5.** XPS N 1s peaks of TiO<sub>2</sub> samples annealed in nitrogen and forming gas environments at 550 °C for 1 hour.

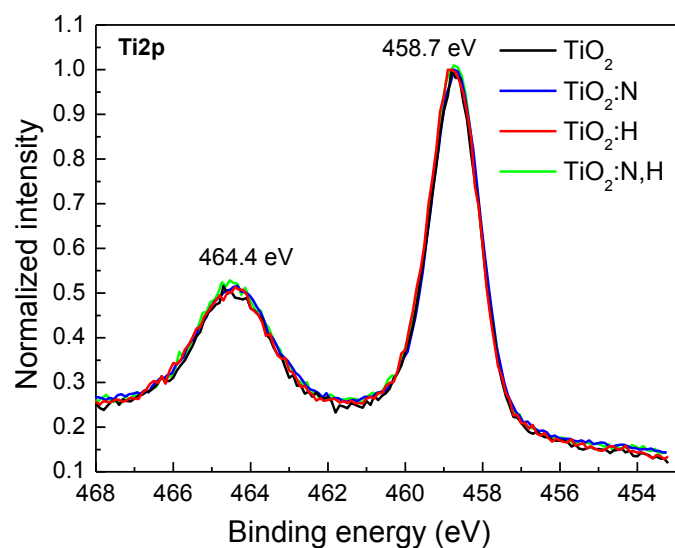

**Figure S6.** XPS Ti 2p peaks of TiO<sub>2</sub> samples annealed in different environments.

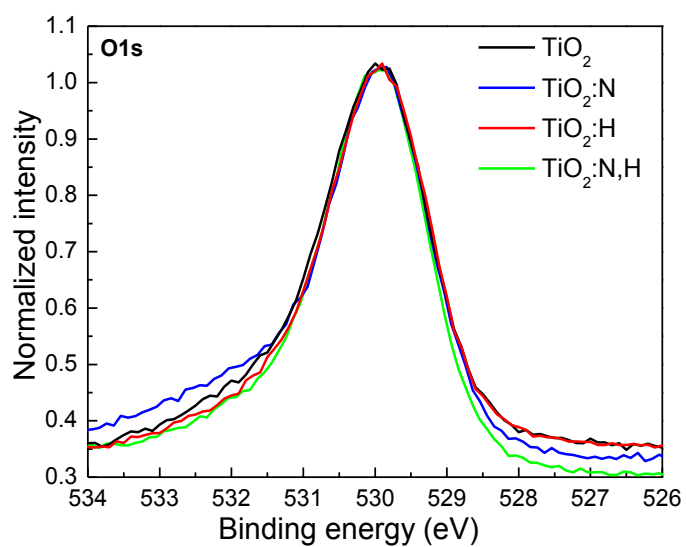

**Figure S7.** XPS O 1s peaks of TiO<sub>2</sub> samples annealed in different environments.

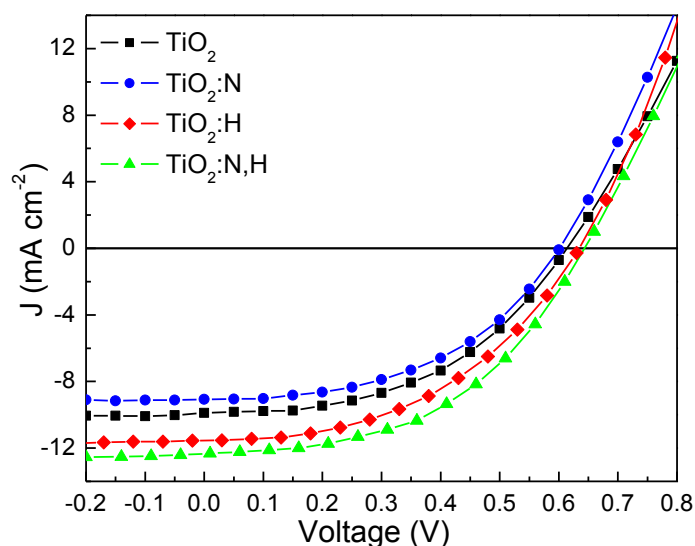

**Figure S8.** Current density versus applied voltage (J-V) curves taken under 1.5 AM illumination of P3HT:PC<sub>70</sub>BM-based organic solar cells using N and H doped and codoped TiO<sub>2</sub> ETLs. The annealing in different environments was performed at 550 °C for 1 hour.

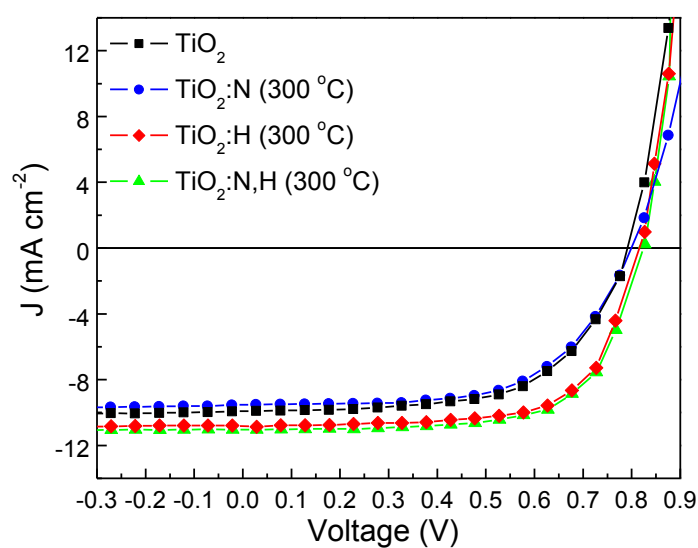

**Figure S9.** Current density versus applied voltage (J-V) curves taken under 1.5 AM illumination of P3HT:IC<sub>60</sub>BM-based organic solar cells using TiO<sub>2</sub> ETLs. The TiO<sub>2</sub> layers were either as-deposited or annealed in nitrogen, hydrogen and forming gas at 300 °C for 30 min.
